# Supplementary material for: Asymmetric gene introgression in two closely related Orchis species: evidence from morphometric and genetic analyses
Source: PubMed Central journal article supplement (PMC3523012; doi:10.1186/1471-2148-12-178), 2012-09-12

**Fig. S1** STRUCTURE analysis of 113 AFLP markers scored in 200 individuals originating from a pure *Orchis militaris* populations, pure *O. purpurea* population and a hybrid population using different values of  $K$ . Fig. S1a gives the most likely number of clusters. Fig. S1b gives the results for  $K = 3$ .

a)

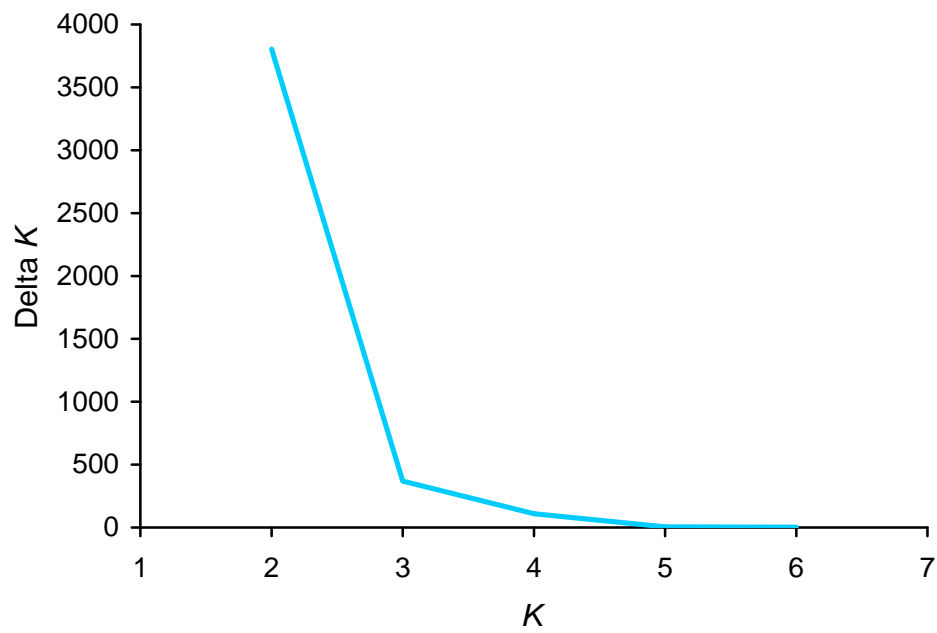

b)

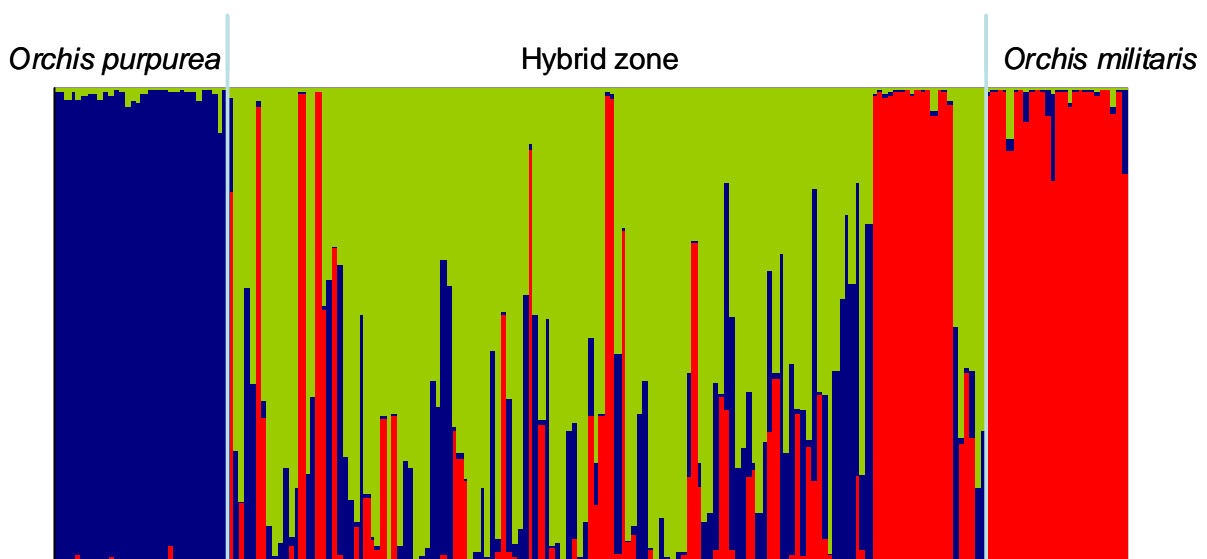

Supplement: 1471-2148-12-178-S1.pdf [file 1471-2148-12-178-S1.pdf]
