# Supplementary material for: Asymmetric gene introgression in two closely related Orchis species: evidence from morphometric and genetic analyses
Source: PubMed Central journal article supplement (PMC3523012; doi:10.1186/1471-2148-12-178), 2012-09-12
Supplement: 1471-2148-12-178-S2.pdf [file 1471-2148-12-178-S2.pdf]

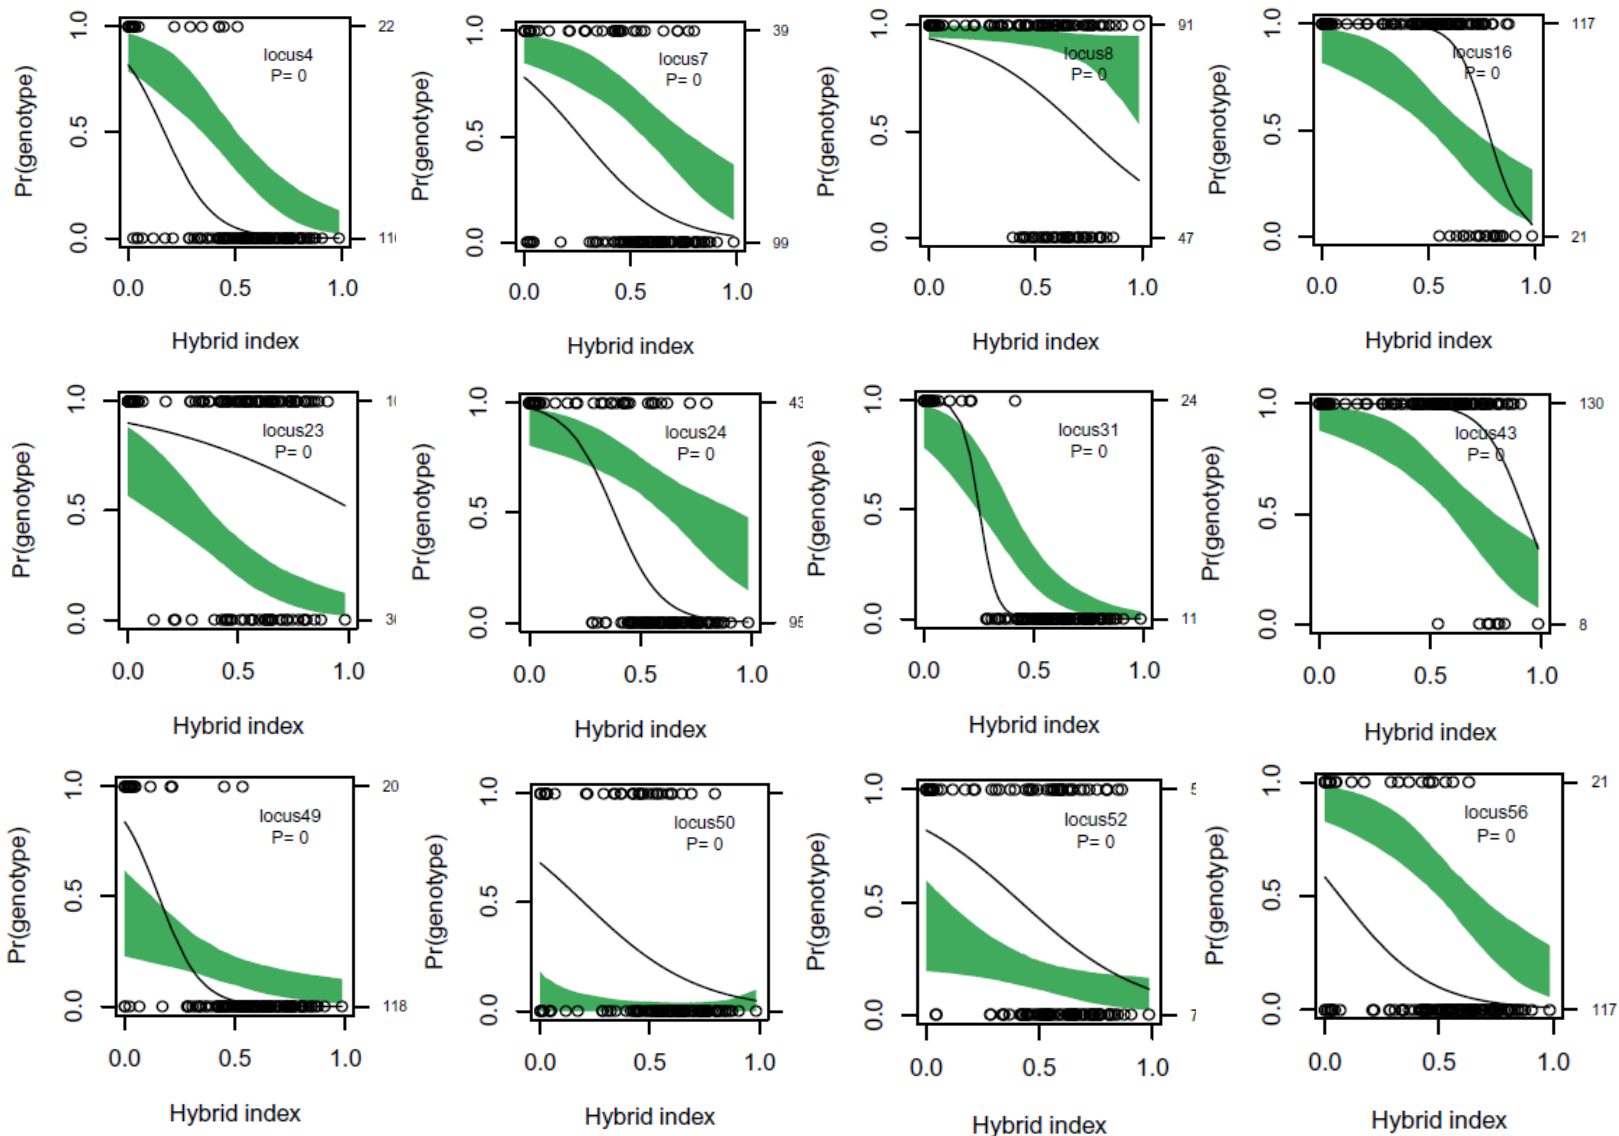

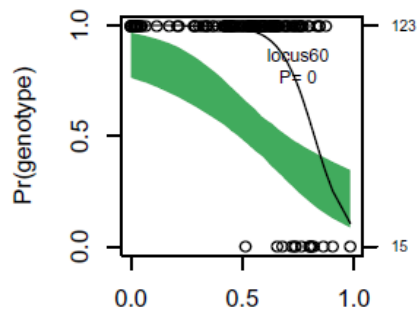

Hybrid index

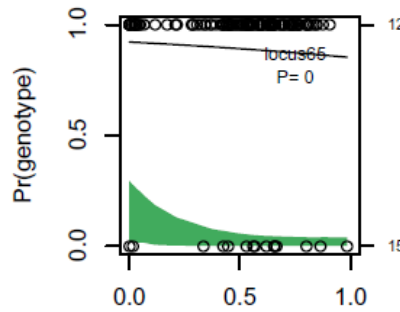

Hybrid index

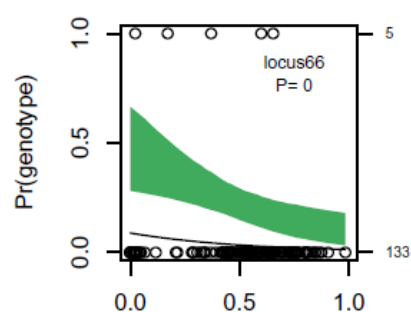

Hybrid index

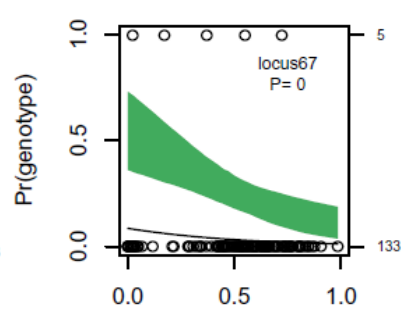

Hybrid index

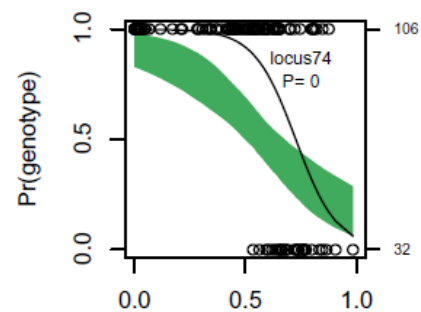

Hybrid index

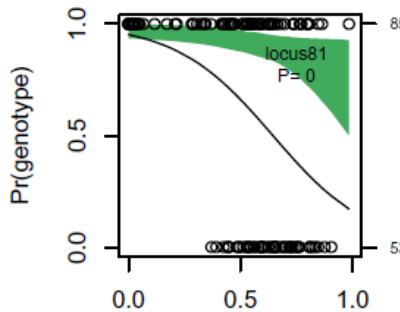

Hybrid index

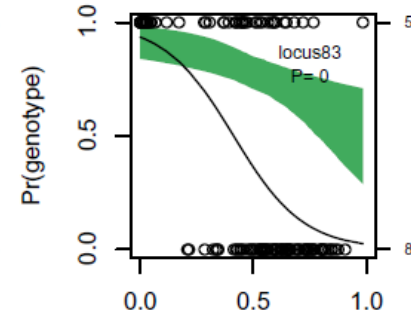

Hybrid index

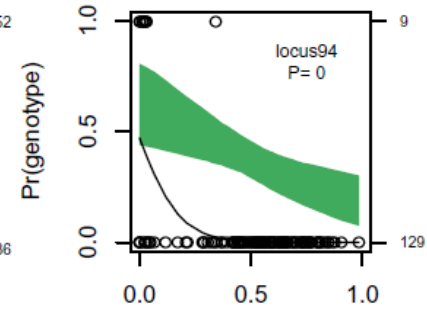

Hybrid index

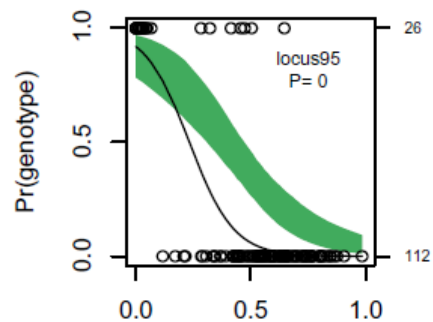

Hybrid index

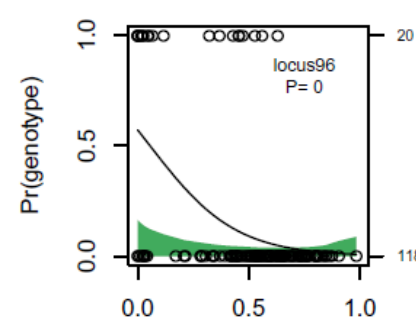

Hybrid index

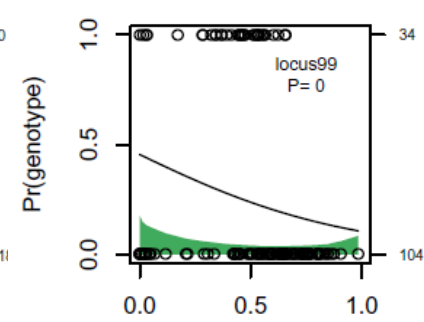

Hybrid index

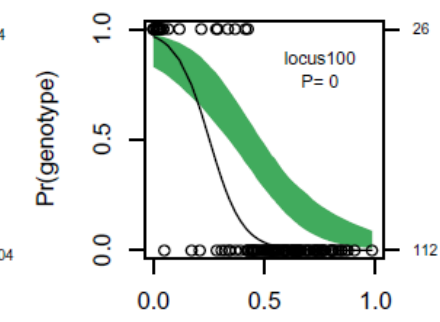

Hybrid index

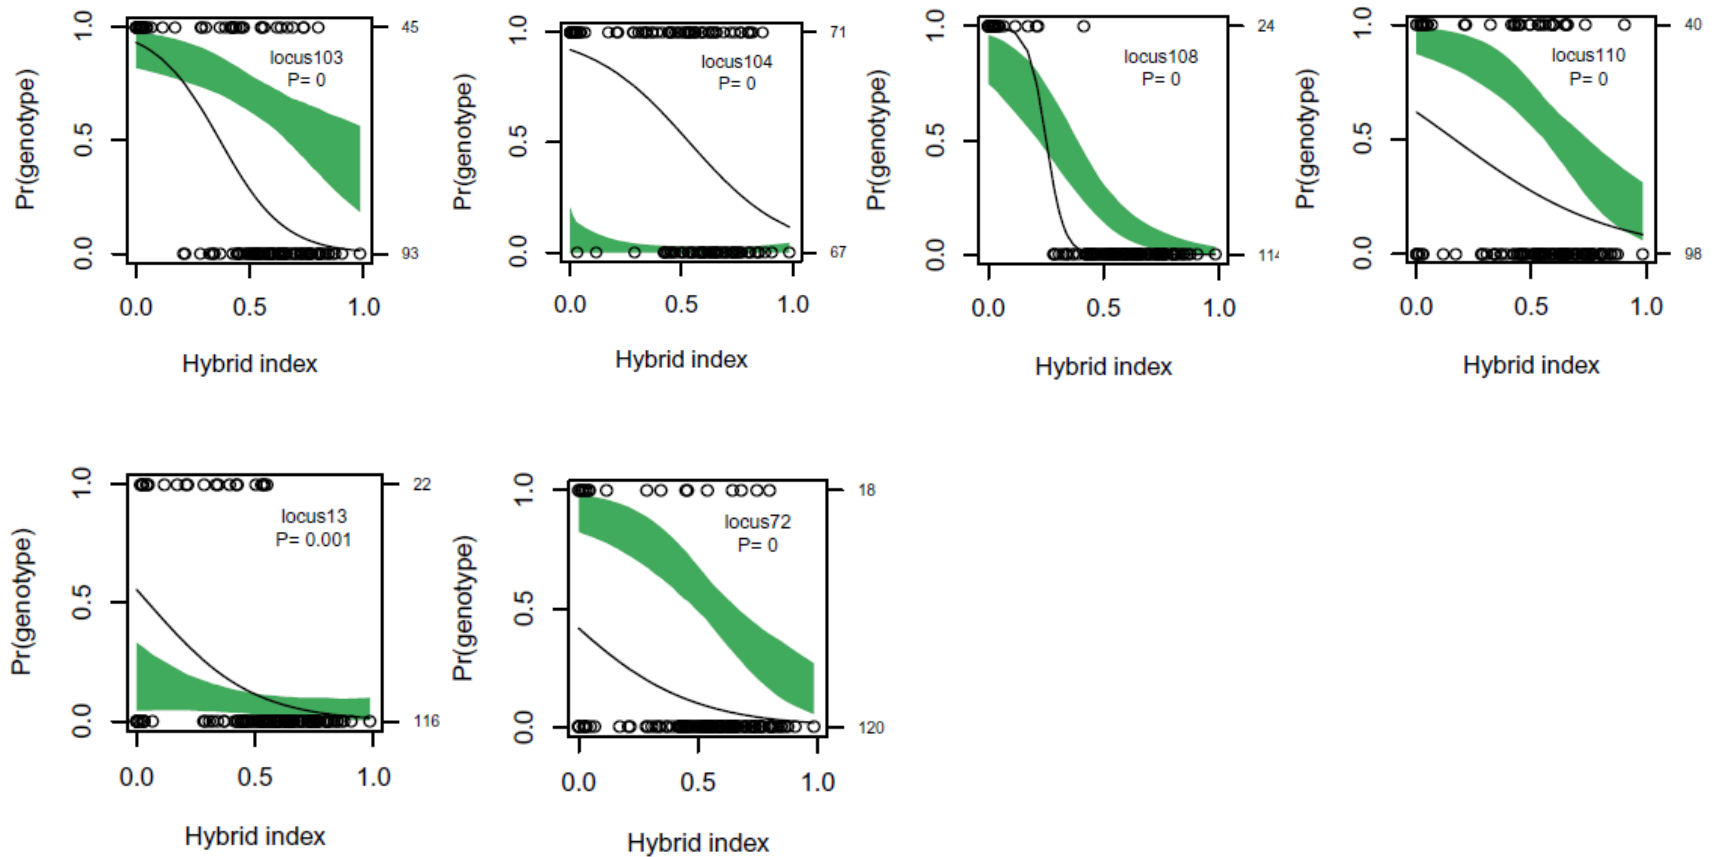

**Additional File 2** Genomic clines for introgression of AFLP markers from a hybrid zone between *Orchis militaris* and *Orchis purpurea*. The name of each locus is given and the  $P$ -value for the test of departure from neutrality. The solid line is the estimated cline based on individuals that lacked the dominant AFLP marker.
