# Supplementary material for: Asymmetric gene introgression in two closely related Orchis species: evidence from morphometric and genetic analyses
Source: PubMed Central journal article supplement (PMC3523012; doi:10.1186/1471-2148-12-178), 2012-09-12

**Additional File 3** Principal component plot of the first and second axis for morphometric data from putative hybrids and both parents (*O. militaris* and *O. purpurea*)

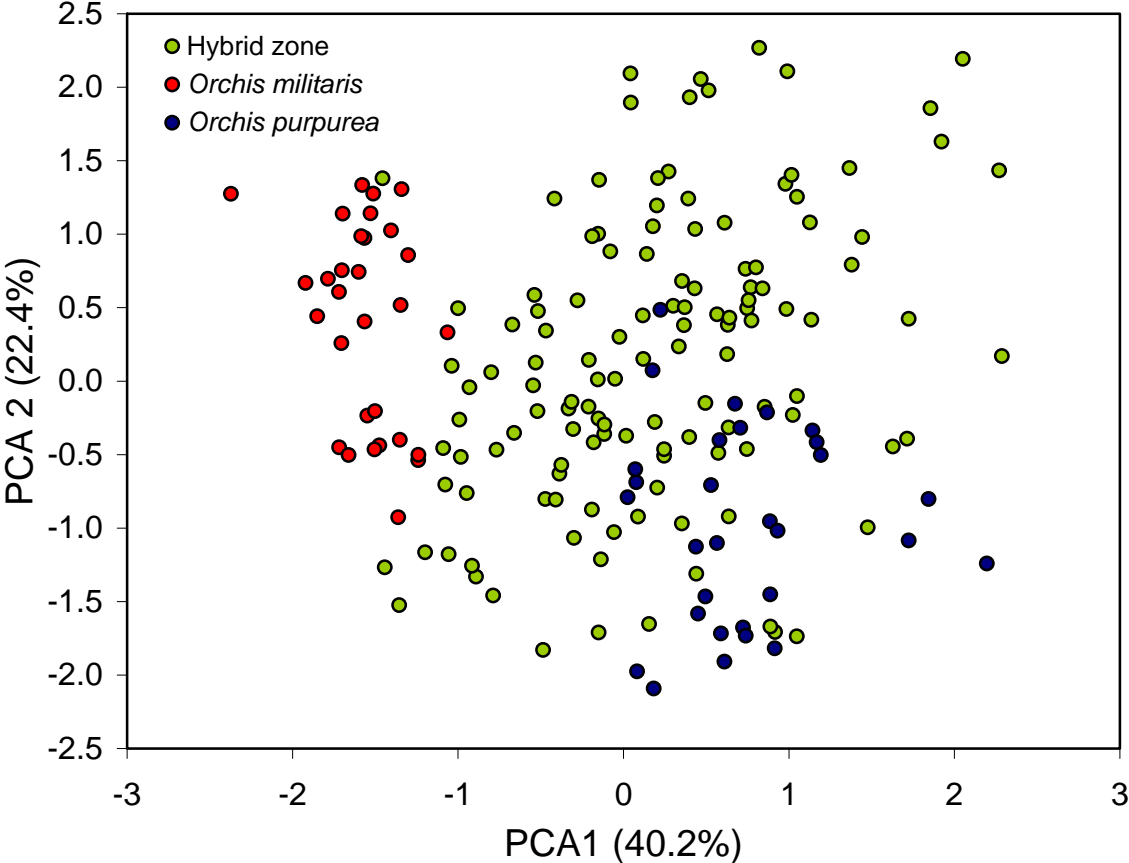

Supplement: 1471-2148-12-178-S3.pdf [file 1471-2148-12-178-S3.pdf]
