# Supplementary material for: Asymmetric gene introgression in two closely related Orchis species: evidence from morphometric and genetic analyses
Source: PubMed Central journal article supplement (PMC3523012; doi:10.1186/1471-2148-12-178), 2012-09-12

**Additional File 4** Floral traits measured in 200 individuals of *O. militaris*, *O. purpurea*, and their putative hybrids. Letters refer to traits listed in Materials and Methods.

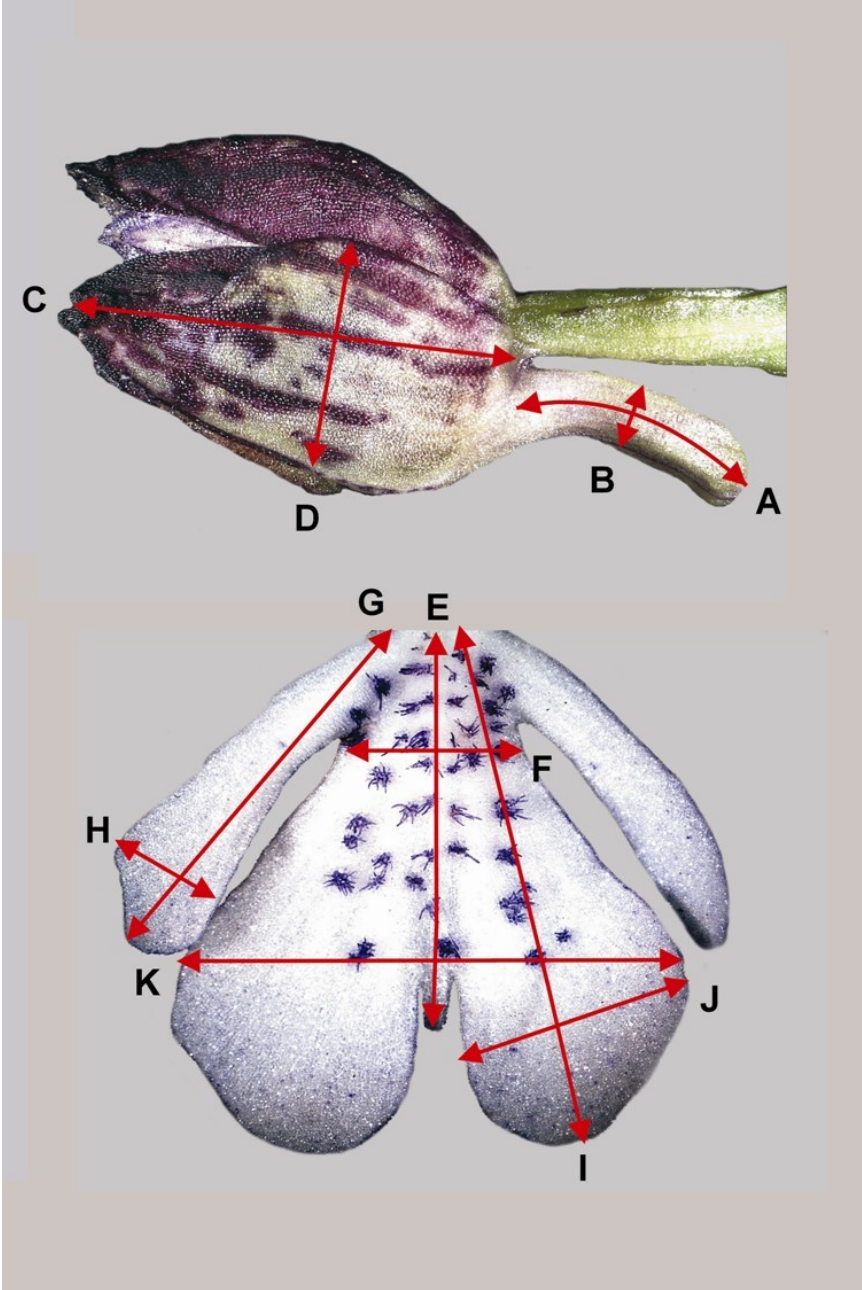

Supplement: 1471-2148-12-178-S4.pdf [file 1471-2148-12-178-S4.pdf]
